# Supplementary material for: Oxygen and sulfur dual vacancy engineering on a 3D Co3O4/Co3S4heterostructure to improve overall water splitting activity
Source: Royal Society of Chemistry journal article supplement (doi:10.1039/d2gc03315a), 2022-01-01
Supplement: d2gc03315a1.pdf [file d2gc03315a1.pdf]

## Supporting information

### **Oxygen and sulfur dual vacancies engineering on 3D Co<sub>3</sub>O<sub>4</sub>/Co<sub>3</sub>S<sub>4</sub> heterostructure to improve overall water splitting activity**

Qing Wang, Hui Xu, Xingyue Qian, Guangyu He\*, Haiqun Chen\*

Key Laboratory of Advanced Catalytic Materials and Technology,

Advanced Catalysis and Green Manufacturing Collaborative Innovation Center,

Changzhou University, Changzhou, Jiangsu Province 213164, China.

---

\* Corresponding author. E-mail address: hegy@cczu.edu.cn; chenhq@cczu.edu.cn.

**Table S1.** Peak area ratios and Co atomic ratios of Co<sub>3</sub>O<sub>4</sub>/Co<sub>3</sub>S<sub>4</sub>@NF and DV-Co<sub>3</sub>O<sub>4</sub>/Co<sub>3</sub>S<sub>4</sub>@NF in the XPS spectra.

| <b>Amounts</b>                                                        |                                | <b>2p<sub>1/2</sub> Co<sup>2+</sup></b> | <b>2p<sub>1/2</sub> Co<sup>3+</sup></b> | <b>2p<sub>3/2</sub> Co<sup>2+</sup></b> | <b>2p<sub>3/2</sub> Co<sup>3+</sup></b> | <b>Co<sup>2+</sup>/Co<sup>3+</sup></b> |
|-----------------------------------------------------------------------|--------------------------------|-----------------------------------------|-----------------------------------------|-----------------------------------------|-----------------------------------------|----------------------------------------|
| Co <sub>3</sub> O <sub>4</sub> /Co <sub>3</sub> S <sub>4</sub> @NF    | Co <sub>3</sub> O <sub>4</sub> | 0.13                                    | 0.87                                    | 0.38                                    | 0.62                                    | 0.34                                   |
|                                                                       | Co <sub>3</sub> S <sub>4</sub> | 0.60                                    | 0.40                                    | 0.62                                    | 0.38                                    | 1.56                                   |
| DV-Co <sub>3</sub> O <sub>4</sub> /Co <sub>3</sub> S <sub>4</sub> @NF | Co <sub>3</sub> O <sub>4</sub> | 0.31                                    | 0.69                                    | 0.59                                    | 0.41                                    | 0.81                                   |
|                                                                       | Co <sub>3</sub> S <sub>4</sub> | 0.64                                    | 0.36                                    | 0.92                                    | 0.08                                    | 3.55                                   |

**Table S2.** Peak area ratios and O atomic ratios of Co<sub>3</sub>O<sub>4</sub>@NF, Co<sub>3</sub>O<sub>4</sub>/Co<sub>3</sub>S<sub>4</sub>@NF, and DV-Co<sub>3</sub>O<sub>4</sub>/Co<sub>3</sub>S<sub>4</sub>@NF in the XPS spectra.

| <b>Amounts</b>                                                        | <b>O<sub>I</sub></b> | <b>O<sub>II</sub></b> | <b>O<sub>III</sub></b> | <b>O<sub>II</sub>/O<sub>I</sub></b> | <b>O<sub>II</sub>/O<sub>III</sub></b> |
|-----------------------------------------------------------------------|----------------------|-----------------------|------------------------|-------------------------------------|---------------------------------------|
| Co <sub>3</sub> O <sub>4</sub> @NF                                    | 0.27                 | 0.18                  | 0.55                   | 0.67                                | 0.33                                  |
| Co <sub>3</sub> O <sub>4</sub> /Co <sub>3</sub> S <sub>4</sub> @NF    | 0.19                 | 0.51                  | 0.30                   | 2.68                                | 1.70                                  |
| DV-Co <sub>3</sub> O <sub>4</sub> /Co <sub>3</sub> S <sub>4</sub> @NF | 0.14                 | 0.80                  | 0.06                   | 5.71                                | 13.33                                 |

**Table S3.** Peak area ratios and S atomic ratios of Co<sub>3</sub>O<sub>4</sub>/Co<sub>3</sub>S<sub>4</sub>@NF and DV-Co<sub>3</sub>O<sub>4</sub>/Co<sub>3</sub>S<sub>4</sub>@NF in the XPS spectra.

| <b>Amounts</b>                                                        | <b>S 2p<sub>1/2</sub></b> | <b>S 2p<sub>3/2</sub></b> | <b>2p<sub>1/2</sub>/2p<sub>3/2</sub></b> |
|-----------------------------------------------------------------------|---------------------------|---------------------------|------------------------------------------|
| Co <sub>3</sub> O <sub>4</sub> /Co <sub>3</sub> S <sub>4</sub> @NF    | 0.57                      | 0.43                      | 1.33                                     |
| DV-Co <sub>3</sub> O <sub>4</sub> /Co <sub>3</sub> S <sub>4</sub> @NF | 0.75                      | 0.25                      | 3                                        |

**Table S4.** Comparison of OER performance with other Co-based electrocatalysts.

| Catalyst                                                               | OER               | Tafel      | Ref.             |
|------------------------------------------------------------------------|-------------------|------------|------------------|
|                                                                        | $\eta_{100}$ (mV) |            |                  |
| <b>DV- Co<sub>3</sub>O<sub>4</sub>/Co<sub>3</sub>S<sub>4</sub>@NF</b>  | <b>233</b>        | <b>75</b>  | <b>This work</b> |
| <b>Co<sub>3</sub>O<sub>4</sub>/Co<sub>3</sub>S<sub>4</sub>@NF</b>      | <b>288</b>        | <b>102</b> | <b>This work</b> |
| NiCo <sub>2</sub> S <sub>4</sub> /CoNi-LDH@CC                          | 337               | 111        | [1]              |
| NiCo <sub>2</sub> S <sub>4</sub> @CC                                   | 370               | 96         | [2]              |
| CoMo <sub>2</sub> S <sub>4</sub> @NF                                   | 370               | 66         | [3]              |
| CuCo <sub>2</sub> S <sub>4</sub> @NF                                   | 245               | 68         | [4]              |
| FeCo <sub>2</sub> S <sub>4</sub> /CoFe-LDH@NF                          | 259               | 69         | [5]              |
| NiCo <sub>2</sub> O <sub>4</sub> /NiMo <sub>2</sub> S <sub>4</sub> @NF | 420               | 95         | [6]              |
| Ru-NiCo <sub>2</sub> O <sub>4</sub> @NF                                | 260               | 83         | [7]              |
| MgO/NiCo <sub>2</sub> S <sub>4</sub> @CC                               | 310               | 115        | [8]              |
| CuCo <sub>2</sub> S <sub>4</sub> /CuCo@CF                              | 300               | 70         | [9]              |
| NW-MnCo <sub>2</sub> O <sub>4</sub> /CC                                | 482               | 111        | [10]             |
| NiCo-LDH/NiCo <sub>2</sub> S <sub>4</sub> /CC                          | 280               | 48         | [11]             |
| MnCo <sub>2</sub> O <sub>4</sub> /Ni <sub>2</sub> P@NF                 | 350               | 114        | [12]             |
| Ru-NiCoP@NF                                                            | 285               | 85         | [13]             |
| CoS/NiS@NF                                                             | 420               | 78         | [14]             |

\* $\eta_{100}$ : The required overpotential at the current density of 100 mA · cm<sup>-2</sup>.

**Table S5.** Comparison of HER performance with other Co-based electrocatalysts.

| Catalyst                                                               | HER<br>$\eta_{10}$ (mV) | Tafel     | Ref.             |
|------------------------------------------------------------------------|-------------------------|-----------|------------------|
| <b>DV- Co<sub>3</sub>O<sub>4</sub>/Co<sub>3</sub>S<sub>4</sub>@NF</b>  | <b>26</b>               | <b>58</b> | <b>This work</b> |
| <b>Co<sub>3</sub>O<sub>4</sub>/Co<sub>3</sub>S<sub>4</sub>@NF</b>      | <b>134</b>              | <b>99</b> | <b>This work</b> |
| CoMo <sub>2</sub> S <sub>4</sub> @NF                                   | 162                     | 116       | [3]              |
| CuCo <sub>2</sub> S <sub>4</sub> @NF                                   | 61                      | 53        | [4]              |
| FeCo <sub>2</sub> S <sub>4</sub> /CoFe-LDH@NF                          | 115                     | 3         | [5]              |
| NiCo <sub>2</sub> O <sub>4</sub> /NiMo <sub>2</sub> S <sub>4</sub> @NF | 159                     | 53        | [6]              |
| NiCo-LDH/NiCo <sub>2</sub> S <sub>4</sub> @CC                          | 150                     | 41        | [11]             |
| P-Co <sub>3</sub> S <sub>4</sub> @CC                                   | 65                      | 125       | [15]             |
| NiCo <sub>2</sub> S <sub>4-x</sub> @CC                                 | 150                     | 83        | [16]             |
| MnCo <sub>2</sub> O <sub>4</sub> /Ni <sub>2</sub> P@NF                 | 57                      | 89        | [12]             |
| Ru-NiCoP@NF                                                            | 44                      | 45        | [13]             |
| Co <sub>3</sub> S <sub>4</sub> /NiMoO <sub>4</sub> /rGO@NF             | 40                      | 47        | [17]             |
| NiCo <sub>2</sub> S <sub>4</sub> /NiFe-LDH@NF                          | 200                     | 101       | [18]             |
| Fe-Co-S@NF                                                             | 143                     | 80        | [19]             |
| Co(OH) <sub>2</sub> /Ni-Co-S@NF                                        | 148                     | 88        | [20]             |

\* $\eta_{10}$ : The required overpotential at the current density of 10 mA·cm<sup>-2</sup>.

**Table S6.** Comparison of overall water splitting (OWS) performance with other bifunctional electrocatalysts.

| Catalyst                                                                                              | OWS<br>P <sub>10</sub> (V) | Ref.             |
|-------------------------------------------------------------------------------------------------------|----------------------------|------------------|
| <b>DV- Co<sub>3</sub>O<sub>4</sub>/Co<sub>3</sub>S<sub>4</sub>@NF</b>                                 | <b>1.44</b>                | <b>This work</b> |
| <b>Co<sub>3</sub>O<sub>4</sub>/Co<sub>3</sub>S<sub>4</sub>@NF</b>                                     | <b>1.54</b>                | <b>This work</b> |
| CoMo <sub>2</sub> S <sub>4</sub> @NF                                                                  | 1.65                       | [3]              |
| CuCo <sub>2</sub> S <sub>4</sub> @NF                                                                  | 1.54                       | [4]              |
| FeCo <sub>2</sub> S <sub>4</sub> /CoFe-LDH@NF                                                         | 1.60                       | [5]              |
| Ru-NiCo <sub>2</sub> O <sub>4</sub> @NF                                                               | 1.45                       | [7]              |
| NW-MnCo <sub>2</sub> O <sub>4</sub> /CC                                                               | 1.47                       | [10]             |
| MnCo <sub>2</sub> O <sub>4</sub> /Ni <sub>2</sub> P@NF                                                | 1.63                       | [12]             |
| Ru-NiCoP@NF                                                                                           | 1.52                       | [13]             |
| Co <sub>3</sub> S <sub>4</sub> @FNC                                                                   | 1.58                       | [21]             |
| CoMoP/Co <sub>3</sub> O <sub>4-x</sub> @NF                                                            | 1.61                       | [22]             |
| CoNi/CoFe <sub>2</sub> O <sub>4</sub> @NF                                                             | 1.57                       | [23]             |
| Co <sub>3</sub> O <sub>4</sub> /Mo-Co <sub>3</sub> S <sub>4</sub> -Ni <sub>3</sub> S <sub>2</sub> @NF | 1.62                       | [24]             |
| Ni <sub>3</sub> S <sub>2</sub> /Co <sub>3</sub> S <sub>4</sub> /FeOOH@NF                              | 1.58                       | [25]             |
| V <sub>o</sub> B-Co <sub>3</sub> O <sub>4</sub> @NF                                                   | 1.67                       | [26]             |
| v-NiS <sub>2</sub> /CeO <sub>2</sub> HSs@NF                                                           | 1.64                       | [27]             |

\*P<sub>10</sub>: The required a cell voltage to drive a current density of 10 mA·cm<sup>-2</sup>.

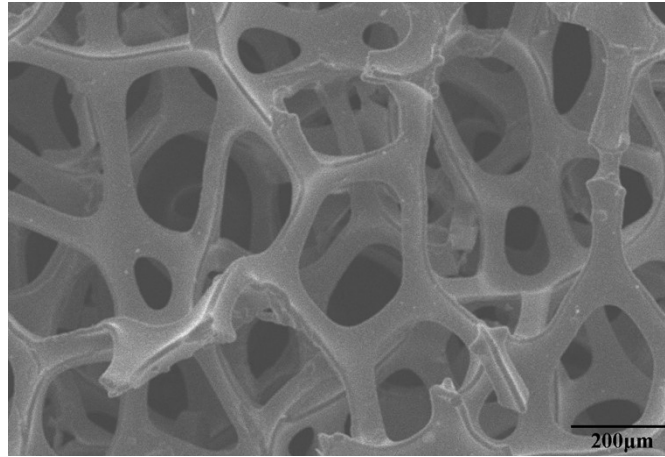

**Fig. S1.** SEM images of NF.

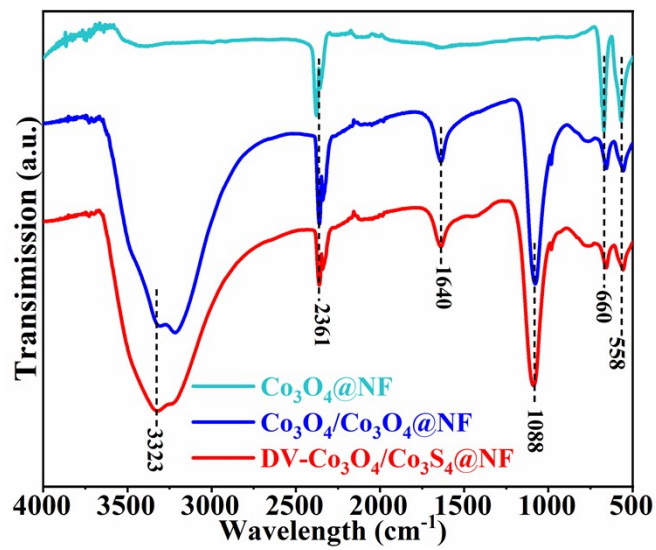

**Fig. S2.** FT-IR spectra of  $\text{Co}_3\text{O}_4$ @NF,  $\text{Co}_3\text{O}_4/\text{Co}_3\text{S}_4$ @NF, and DV- $\text{Co}_3\text{O}_4/\text{Co}_3\text{S}_4$ @NF.

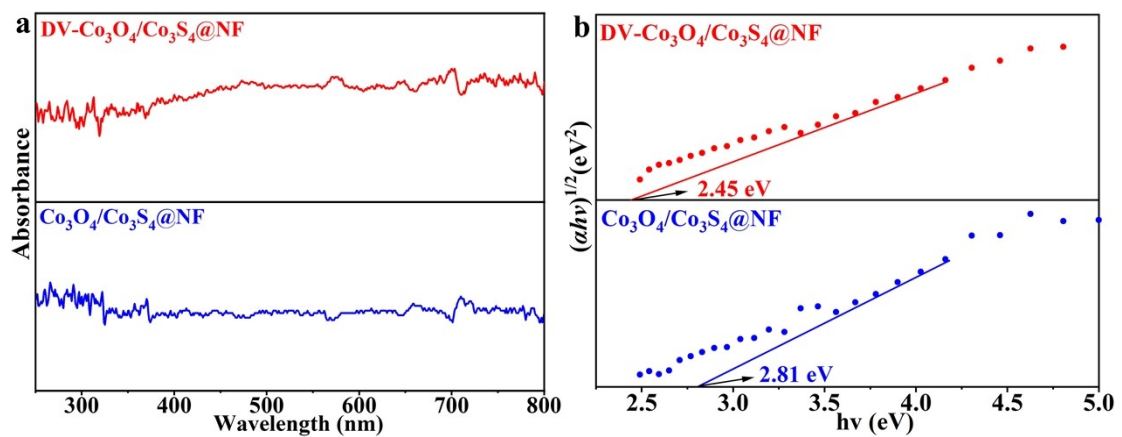

**Fig. S3.** (a) UV-vis absorption spectra and (b) the band gap energy of  $\text{Co}_3\text{O}_4/\text{Co}_3\text{S}_4$ @NF and DV- $\text{Co}_3\text{O}_4/\text{Co}_3\text{S}_4$ @NF.

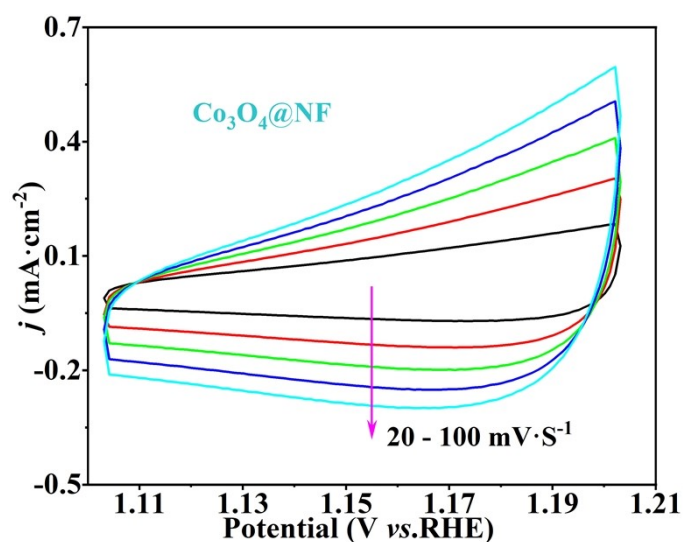

Fig. S4. CV curves at different scan rates for  $\text{Co}_3\text{O}_4@\text{NF}$ .

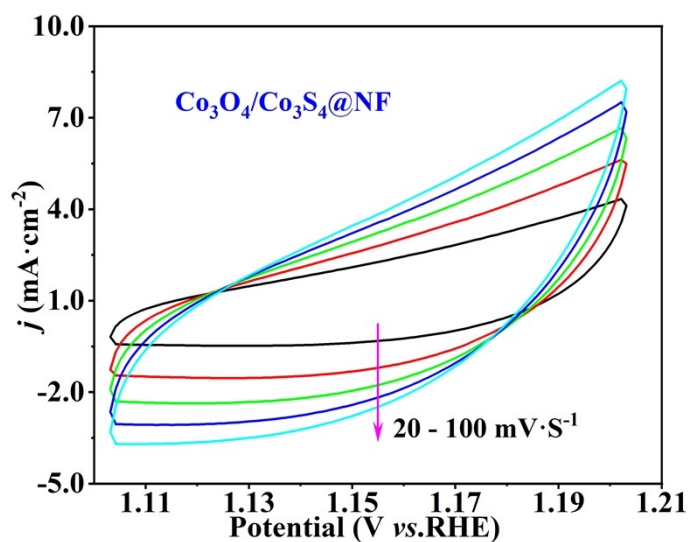

Fig. S5. CV curves at different scan rates for  $\text{Co}_3\text{O}_4/\text{Co}_3\text{S}_4@\text{NF}$ .

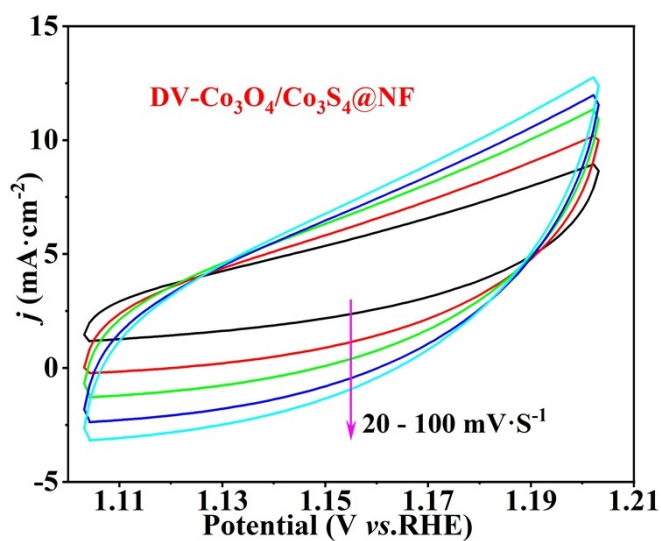

Fig. S6. CV curves at different scan rates for  $\text{DV-Co}_3\text{O}_4/\text{Co}_3\text{S}_4@\text{NF}$ .

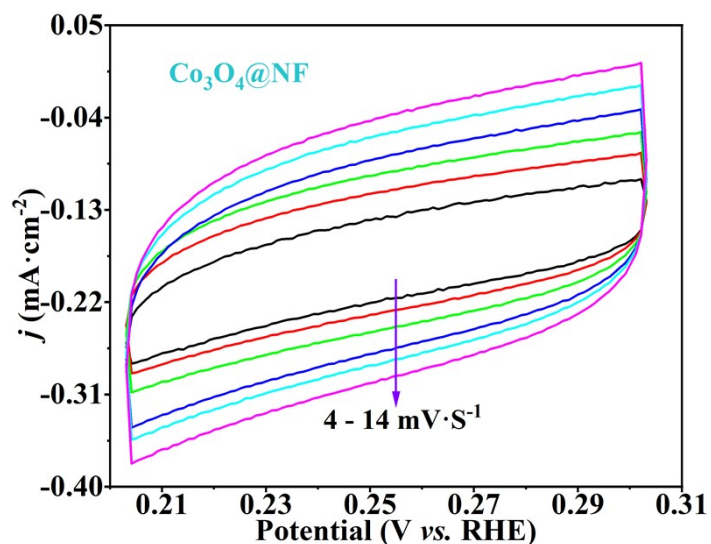

Fig. S7. CV curves at different scan rates for  $\text{Co}_3\text{O}_4 @\text{NF}$ .

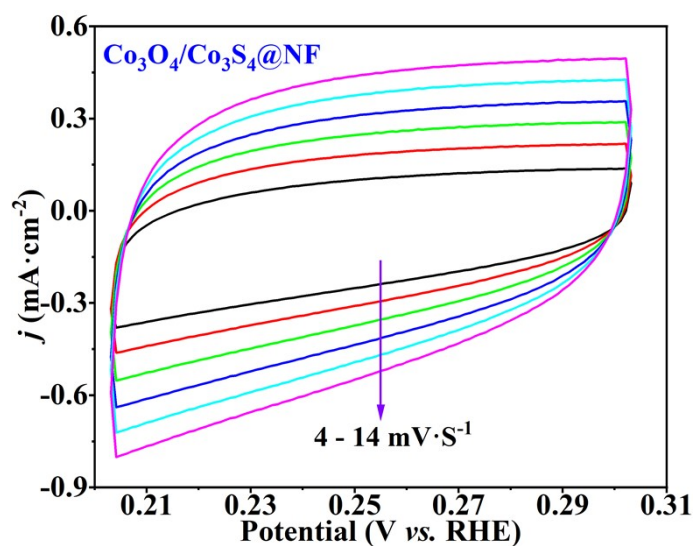

Fig. S8. CV curves at different scan rates for  $\text{Co}_3\text{O}_4/\text{Co}_3\text{S}_4 @\text{NF}$ .

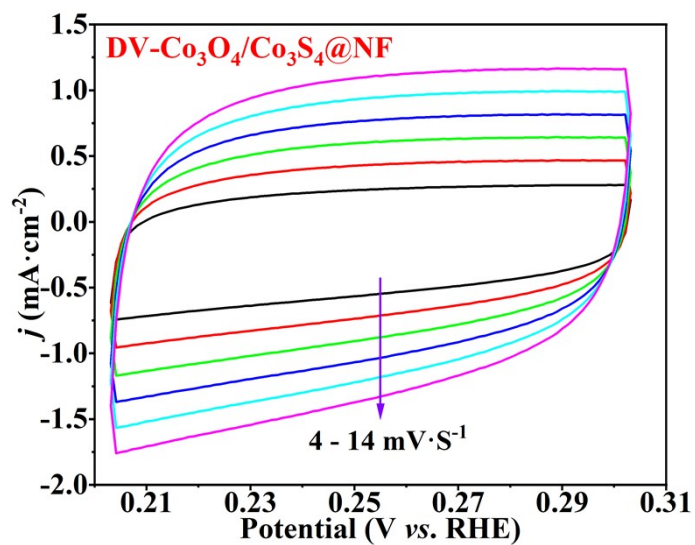

Fig. S9. CV curves at different scan rates for  $\text{DV-Co}_3\text{O}_4/\text{Co}_3\text{S}_4 @\text{NF}$ .



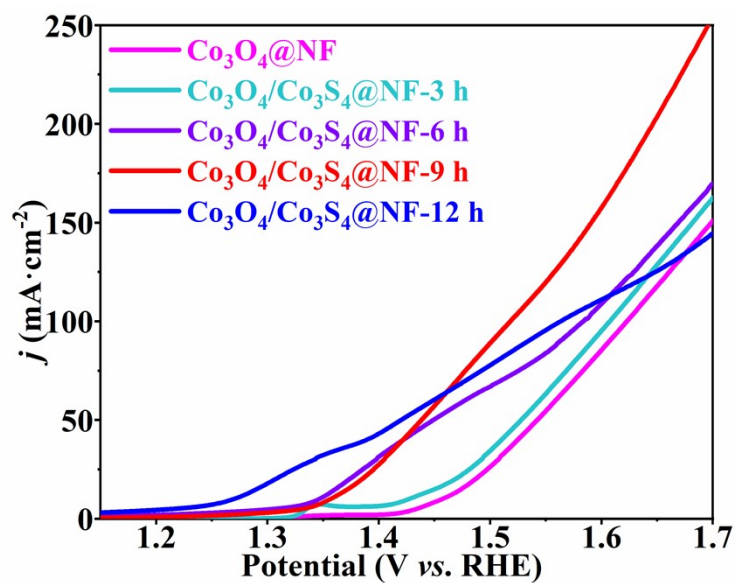

Fig. 10. OER polarization curves of Co<sub>3</sub>O<sub>4</sub>/Co<sub>3</sub>S<sub>4</sub>@NF by different sulphuration time

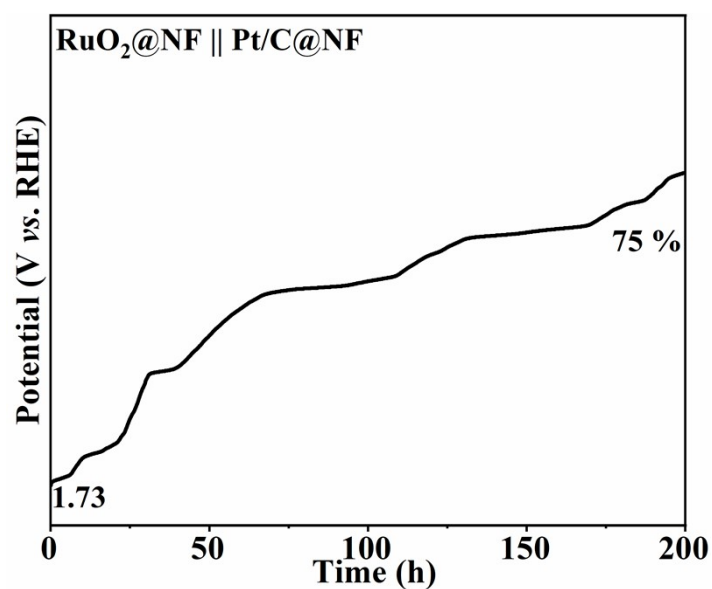

Fig. S11. The chrono-potentiometric curve of RuO<sub>2</sub>@NF || Pt/C@NF.

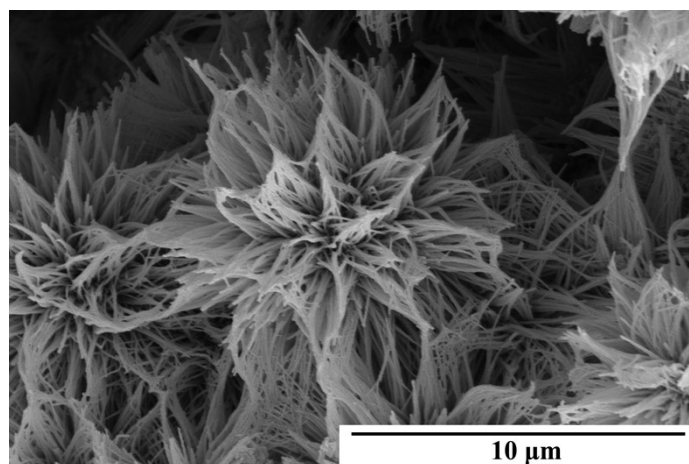

Fig. S12. SEM image of DV-Co<sub>3</sub>O<sub>4</sub>/Co<sub>3</sub>S<sub>4</sub>@NF after OER test.

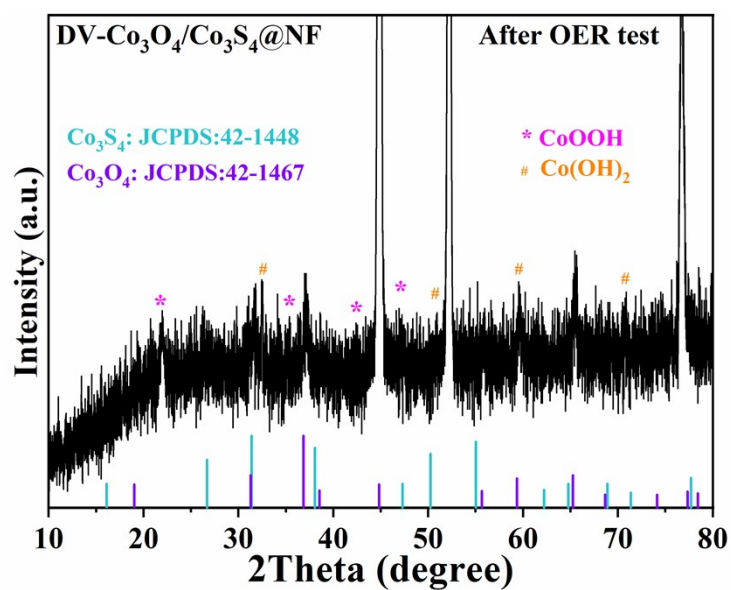

Fig. S13. XRD pattern of DV- $\text{Co}_3\text{O}_4/\text{Co}_3\text{S}_4@\text{NF}$  after OER test.

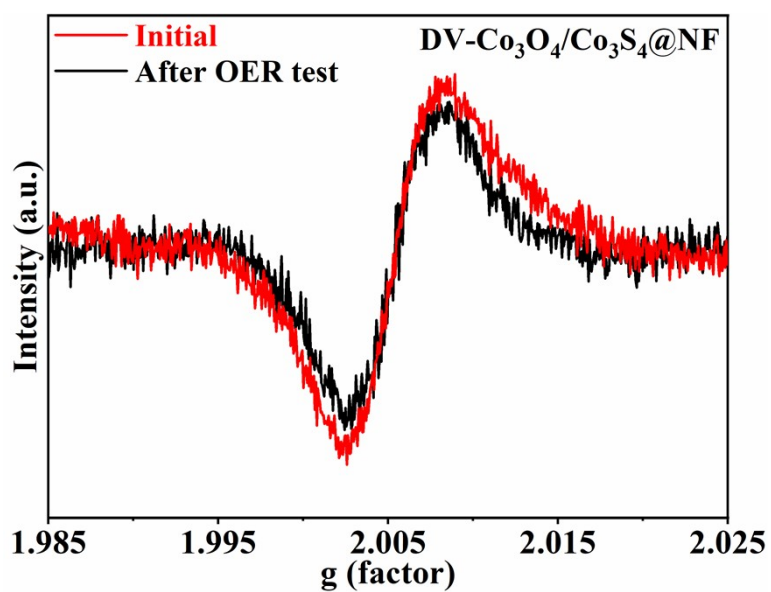

Figure S14. EPR spectra of DV-  $\text{Co}_3\text{O}_4/\text{Co}_3\text{S}_4@\text{NF}$  before and after OER test.

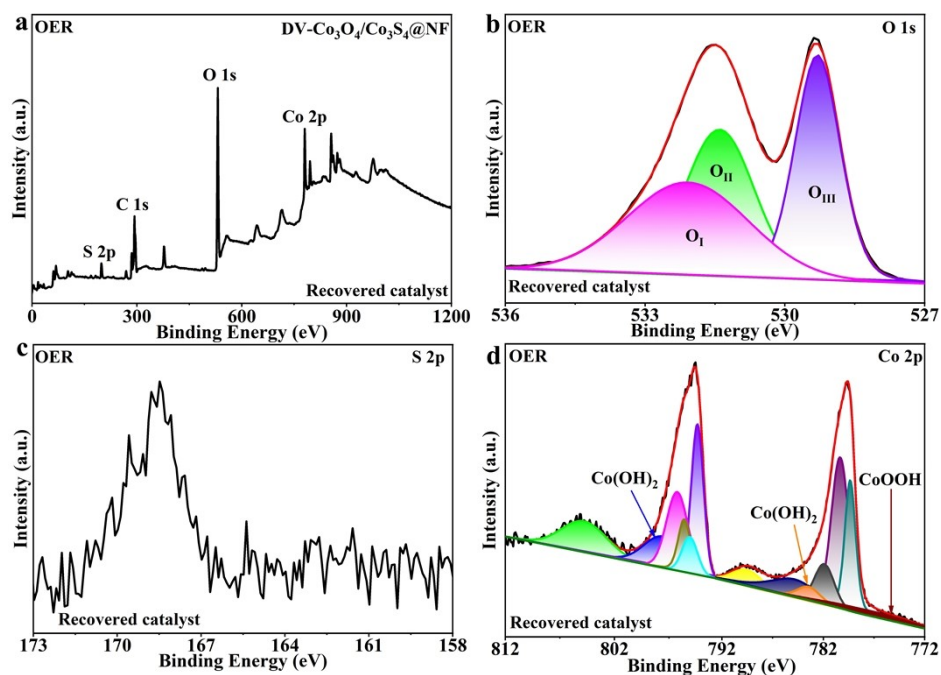

**Fig. S15** (a) XPS spectra of DV-Co<sub>3</sub>O<sub>4</sub>/Co<sub>3</sub>S<sub>4</sub>@NF, high-resolution XPS of (b) O 1s, (c) S 2p, and (d) Co 2p after 100 h stability test for OER.

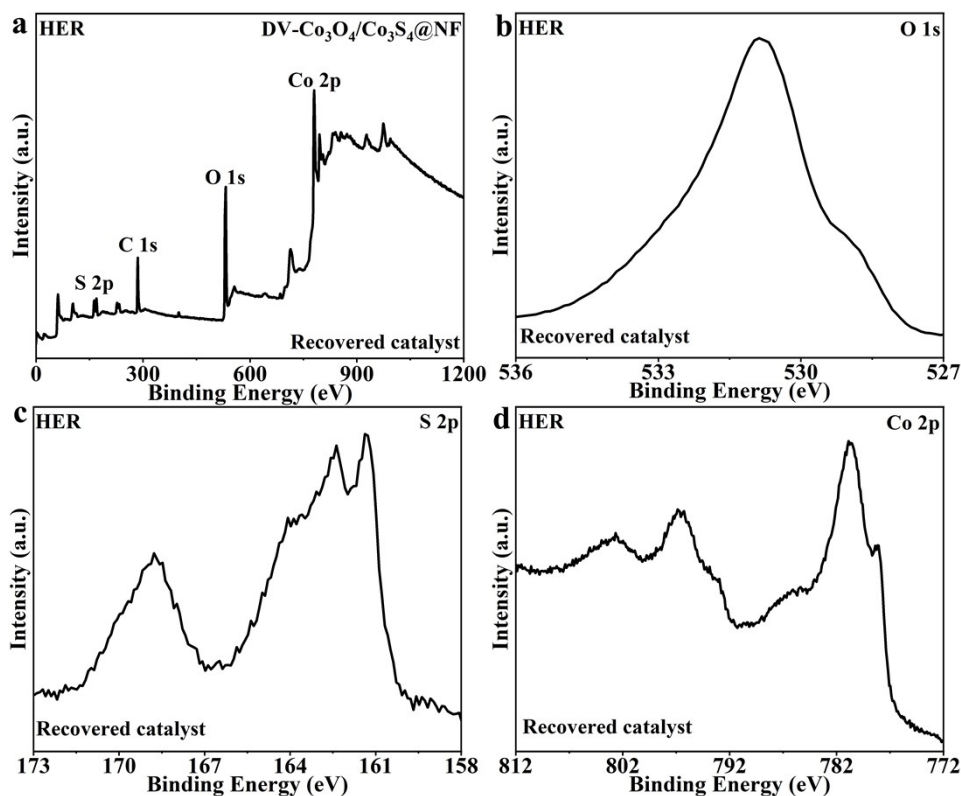

**Fig. S16** (a) XPS spectra of DV-Co<sub>3</sub>O<sub>4</sub>/Co<sub>3</sub>S<sub>4</sub>@NF, high-resolution XPS of (b) O 1s, (c) S 2p, and (d) Co 2p after 100 h stability test for HER.

## References

1. F. Yuan, J. Wei, G. Qin and Y. Ni, *J. Alloys Compd.*, 2020, **830**, 154658.
2. D. Wang, L. Tian, J. Huang, D. Li, J. Liu, Y. Xu, H. Ke and Q. Wei, *Electrochim. Acta*, 2020, **334**, 135636.
3. S. Tang, X. Li, M. Courté, J. Peng and D. Fichou, *Inorg. Chem. Front.*, 2020, **7**, 2241-2247.
4. L. Shao, Z.-X. Liang, H. Chen, Z.-X. Song, X.-H. Deng, G. Huo, X.-M. Kang, L. Wang, X.-Z. Fu and J.-L. Luo, *J. Alloys Compd.*, 2020, **845**, 155392.
5. Y. Huang, X. Chen, S. Ge, Q. Zhang, X. Zhang, W. Li and Y. Cui, *Catal. Sci. Technol.*, 2020, **10**, 1292-1298.
6. D. Zhao, M. Dai, H. Liu, K. Chen and J. Liu, *Adv. Mater. Interfaces*, 2019, **6**, 1901308.
7. D. Wang, Y. Chen, L. Fan, T. Xiao, T. Meng, Z. Xing and X. Yang, *Appl. Catal. B.*, 2022, **305**, 121081.
8. W.-Z. Chen, M. Zhang, Y. Liu, X.-M. Yao, P.-Y. Liu, Z. Liu, J. He and Y.-Q. Wang, *Appl. Catal. B.*, 2022, **312**, 121432.
9. H. Xu, D. Song, J. Li, Y. Zhao, R. Yang and J. Zhao, *J Colloid Interface Sci.*, 2021, **601**, 437-445.
10. L. Qi, Z. Zheng, C. Xing, Z. Wang, X. Luan, Y. Xue, F. He and Y. Li, *Adv. Funct. Mater.*, 2021, **32**, 2107179.
11. Y. Liu, Y. Bai, W. Yang, J. Ma and K. Sun, *Electrochim. Acta*, 2021, **367**, 137534.
12. J. Ge, W. Zhang, J. Tu, T. Xia, S. Chen and G. Xie, *Small*, 2020, **16**, 2001856.

13. D. Chen, R. Lu, Z. Pu, J. Zhu, H.-W. Li, F. Liu, S. Hu, X. Luo, J. Wu, Y. Zhao and S. Mu, *Appl. Catal. B.*, 2020, **279**, 119396.
14. R. Guo, S. Zhang, H. Wen, Z. Ni, Y. He, T. Yu and J. You, *New J. Chem.*, 2021, **45**, 1887-1892.
15. Z. Guo, G. Tian, L. Liu, B. Zhang, Q. Wu, Y. Cao, J. Tu, L. Ding and X. Zhang, *J. Mater. Sci. Technol.*, 2021, **89**, 52-58.
16. X. Guo, Z. Liu, F. Liu, J. Zhang, L. Zheng, Y. Hu, J. Mao, H. Liu, Y. Xue and C. Tang, *Catal. Sci. Technol.*, 2020, **10**, 1056-1065.
17. M. Jiang, Z. Hu, Y. Wang, C. Xiang, Y. Zou, F. Xu, Q. Yang, J. Zhang and L. Sun, *J. Alloys Compd.*, 2022, **927**, 166824.
18. J. Liu, J. Wang, B. Zhang, Y. Ruan, L. Lv, X. Ji, K. Xu, L. Miao and J. Jiang, *ACS Appl. Mater. Interfaces.*, 2017, **9**, 15364-15372.
19. G. Ma, X. Du and X. Zhang, *Chemistry-Asian J.*, 2021, **16**, 959-965.
20. F. Wu, X. Guo, G. Hao, Y. Hu and W. Jiang, *J. solid state electr.* 2019, **23**, 2627-2637.
21. X. Zhu, J. Dai, L. Li, D. Zhao, Z. Wu, Z. Tang, L.-J. Ma and S. Chen, *Carbon*, 2020, **160**, 133-144.
22. Y. Hao, G. Du, Y. Fan, L. Jia, D. Han, W. Zhao, Q. Su, S. Ding and B. Xu, *ACS Appl. Mater. Interfaces*, 2021, **13**, 55263-55271.
23. L. Shasha, S. Suchada, Y. Akihiro, A. Xiaowei, H. Xiaogang, A. Abuliti and G. Guoqing, *J. Mater. Chem. A*, 2018, **6**, 19221-19230.
24. Q. Wu, A. Dong, C. Yang, L. Ye, L. Zhao and Q. Jiang, *Chem. Eng. J.*, 2021, **413**,

127482.

25. F. Chen, B. Xs, C.B. Jia, A. Ll, A. Gl, B. Zj and B. Gz, *Colloid Surface A*, 2021, **631**, 127689.
26. H. Yuan, S. Wang, Z. Ma, M. Kundu, B. Tang, J. Li and X. Wang, *Chem. Eng. J.*, 2021, **404**, 126474.
27. W.Y. Liao, W.D.Z. Li and Y. Zhang, *Mater. Today Chem.*, 2022, **24**, 1-8.
